# Supplementary material for: Effects of dietary fennel (Foeniculum vulgare Mill.) seed powder supplementation on growth performance, nutrient digestibility, small intestinal morphology, and carcass traits of broilers
Source: PeerJ. 2021 Jan 28;9:e10308. doi: 10.7717/peerj.10308 (PMC7847707; doi:10.7717/peerj.10308)
Supplement: Supplemental Information 1 [file peerj-09-10308-s001.xlsx]

## Sheet: 21d Nutrient digestibility
	daily feed intake （kg）	Diet DM（%）	daily DM intake （g）	Daily fecal output（g）	fecal DM（%）	Daily DM output（g）	DM apparent metabolic rate（%）			daily feed intake （kg）	Diet OM（%）	daily OM intake （g）	Daily fecal output（g）	fecal OM（%）	Daily OM output（g）	OM apparent metabolic rate（%）
1-1	0.6825	91.56	624.897	191.25	92.39	176.696	71.724		1-1	0.6825	85.76	585.312	191.25	78.99	151.068	74.1901
1-2	0.826	91.56	756.286	185.475	92.31	171.212	77.3615		1-2	0.826	85.76	708.378	185.475	79.08	146.674	79.2944
1-3	0.77375	91.56	708.446	221.08	92.17	203.769	71.2371		1-3	0.77375	85.76	663.568	221.08	78.77	174.145	73.7563
1-4	0.77625	91.56	710.735	219.21	92.32	202.375	71.526		1-4	0.77625	85.76	665.712	219.21	79.22	173.658	73.9139
2-1	0.7245	91.56	663.352	210.345	92.1	193.728	70.7956		2-1	0.7245	85.76	621.331	210.345	77.6	163.228	73.7294
2-2	0.798	91.56	730.649	229.695	92.12	211.595	71.0401		2-2	0.798	85.76	684.365	229.695	77.79	178.68	73.8912
2-3	0.7525	91.56	688.989	242.85	92.42	224.442	67.4244		2-3	0.7525	85.76	645.344	242.85	78.02	189.472	70.6402
2-4	0.84	91.56	769.104	205.26	92.36	189.578	75.3508		2-4	0.84	85.76	720.384	205.26	76.61	157.25	78.1714
3-1	0.77625	91.56	710.735	208.5	91.49	190.757	73.1606		3-1	0.77625	85.76	665.712	208.5	78.79	164.277	75.3231
3-2	0.7955	91.56	728.36	234.735	92.47	217.059	70.1989		3-2	0.7955	85.76	682.221	234.735	79.04	185.535	72.8043
3-3	0.8095	91.56	741.178	172.89	92.48	159.889	78.4278		3-3	0.8095	85.76	694.227	172.89	79.08	136.721	80.306
3-4	0.89825	91.56	822.438	212.25	92.32	195.949	76.1746		3-4	0.89825	85.76	770.339	212.25	79.47	168.675	78.1038
4-1	0.73125	91.56	669.533	211.2	92.31	194.959	70.8814		4-1	0.73125	85.76	627.12	211.2	80.01	168.981	73.0544
4-2	0.83625	91.56	765.671	238.785	92.21	220.184	71.243		4-2	0.83625	85.76	717.168	238.785	79.66	190.216	73.4768
4-3	0.7375	91.56	675.255	235.59	92.26	217.355	67.8114		4-3	0.7375	85.76	632.48	235.59	78.89	185.857	70.6146
4-4	0.77	91.56	705.012	219.585	92.27	202.611	71.2613		4-4	0.77	85.76	660.352	219.585	79.42	174.394	73.5907
	daily feed intake （kg）	Diet CP(%)	daily CP intake （g）	Daily fecal output（g）	fecal CP（%）	Daily CP output（g）	CP apparent metabolic rate（%）			daily feed intake （kg）	Diet Ash（%）	daily Ash intake （g）	Daily Ash output（g）	Ash apparent metabolic rate（%）
1-1	0.6825	22.16	151.242	191.25	33.27	63.6289	57.9291		1-1	0.6825	5.8	39.585	25.6275	35.2596
1-2	0.826	22.16	183.042	185.475	25.76	47.7784	73.8975		1-2	0.826	5.8	47.908	24.5383	48.7803
1-3	0.77375	22.16	171.463	221.08	28.94	63.9806	62.6855		1-3	0.77375	5.8	44.8775	29.6247	33.9876
1-4	0.77625	22.16	172.017	219.21	32.61	71.4844	58.4434		1-4	0.77625	5.8	45.0225	28.7165	36.2174
1-5	0.7245	22.16	160.549	210.345	24.5	51.5345	67.9011		2-1	0.7245	5.8	42.021	30.5	27.4172
1-6	0.798	22.16	176.837	229.695	27.92	64.1308	63.7344		2-2	0.798	5.8	46.284	32.9153	28.8841
1-7	0.7525	22.16	166.754	242.85	23.16	56.2441	66.2712		2-3	0.7525	5.8	43.645	34.9704	19.8754
1-8	0.84	22.16	186.144	205.26	26.32	54.0244	70.9771		2-4	0.84	5.8	48.72	32.3284	33.6444
1-9	0.77625	22.16	172.017	208.5	28.13	58.651	65.9039		3-1	0.77625	5.8	45.0225	26.4795	41.1861
1-10	0.7955	22.16	176.283	234.735	33.76	79.2465	55.0458		3-2	0.7955	5.8	46.139	31.5249	31.674
1-11	0.8095	22.16	179.385	172.89	23.51	40.6464	77.3413		3-3	0.8095	5.8	46.951	23.1673	50.6565
1-12	0.89825	22.16	199.052	212.25	24.6	52.2135	73.7689		3-4	0.89825	5.8	52.0985	27.2741	47.6489
1-13	0.73125	22.16	162.045	211.2	25.69	54.2573	66.5172		4-1	0.73125	5.8	42.4125	25.9776	38.7501
1-14	0.83625	22.16	185.313	238.785	30.3	72.3519	60.9569		4-2	0.83625	5.8	48.5025	29.9675	38.2145
1-15	0.7375	22.16	163.43	235.59	27.23	64.1512	60.747		4-3	0.7375	5.8	42.775	31.4984	26.3626
1-16	0.77	22.16	170.632	219.585	24.12	52.9639	68.9602		4-4	0.77	5.8	44.66	28.2167	36.8189

## Sheet: 42dNutrient digestibility
	daily feed intake （kg）	Diet DM（%）	daily DM intake （g）	Daily fecal output（g）	fecal DM（%）	Daily DM output（g）	DM apparent metabolic rate（%）				daily feed intake （kg）	Diet OM（%）	daily OM intake （g）	Daily fecal output（g）	fecal OM（%）	Daily OM output（g）	OM apparent metabolic rate（%）
1-1	0.7575	91.33	691.825	274.86	92.79	255.043	63.1348			1-1	0.7575	85.93	650.92	274.86	79.4	218.239	66.4722
1-2	1.1675	91.33	1066.28	420.3	92.78	389.954	63.4284			1-2	1.1675	85.93	1003.23	420.3	80.82	339.686	66.1408
1-3	1.2025	91.33	1098.24	386.04	92.54	357.241	67.4716			1-3	1.2025	85.93	1033.31	386.04	79.13	305.473	70.4373
1-4	1.29	91.33	1178.16	384.15	92.74	356.261	69.7612			1-4	1.29	85.93	1108.5	384.15	79.48	305.322	72.4562
2-1	1.14375	91.33	1044.59	341.73	93.09	318.116	69.5462			2-1	1.14375	85.93	982.824	341.73	78.77	269.181	72.6115
2-2	1.22375	91.33	1117.65	407.88	93.06	379.573	66.0383			2-2	1.22375	85.93	1051.57	407.88	80.43	328.058	68.803
2-3	1.2825	91.33	1171.31	396.99	92.54	367.375	68.6355			2-3	1.2825	85.93	1102.05	396.99	82.76	328.549	70.1875
2-4	1.35	91.33	1232.95	378.42	92.99	351.893	71.4594			2-4	1.35	85.93	1160.06	378.42	80.26	303.72	73.8185
3-1	1.165	91.33	1063.99	371.25	92.87	344.78	67.5957			3-1	1.165	85.93	1001.08	371.25	79.24	294.178	70.614
3-2	1.16875	91.33	1067.42	361.74	93	336.418	68.483			3-2	1.16875	85.93	1004.31	361.74	79.91	289.066	71.2173
3-3	1.08875	91.33	994.355	335.37	92.82	311.29	68.6942			3-3	1.08875	85.93	935.563	335.37	78.56	263.467	71.8387
3-4	0.9775	91.33	892.751	285.09	92.81	264.592	70.3622			3-4	0.9775	85.93	839.966	285.09	79.01	225.25	73.1835
4-1	1.18	91.33	1077.69	404.22	92.93	375.642	65.1439			4-1	1.18	85.93	1013.97	404.22	80.9	327.014	67.7493
4-2	1.38875	91.33	1268.35	413.16	92.83	383.536	69.7609			4-2	1.38875	85.93	1193.35	413.16	79.26	327.471	72.5588
4-3	1.33375	91.33	1218.11	399.84	92.76	370.892	69.552			4-3	1.33375	85.93	1146.09	399.84	79.33	317.193	72.3239
4-4	1.235	91.33	1127.93	267.63	92.81	248.387	77.9784			4-4	1.235	85.93	1061.24	267.63	79.77	213.488	79.883
	daily feed intake （kg）	Diet CP(%)	daily CP intake （g）	Daily fecal output（g）	fecal CP（%）	Daily CP output（g）	CP apparent metabolic rate（%）				daily feed intake （kg）	Diet Ash（%）	daily Ash intake （g）	Daily Ash output（g）	Ash apparent metabolic rate（%）
1-1	0.7575	20.71	156.878	274.86	30.23	83.0902	47.0352			1-1	0.7575	5.4	40.905	36.8038	10.0263
1-2	1.1675	20.71	241.789	420.3	30.13	126.636	47.6253			1-2	1.1675	5.4	63.045	50.2679	20.2667
1-3	1.2025	20.71	249.038	386.04	33.88	130.79	47.4817			1-3	1.2025	5.4	64.935	51.768	20.2773
1-4	1.29	20.71	267.159	384.15	32.61	125.271	53.1098			1-4	1.29	5.4	69.66	50.9383	26.8758
2-1	1.14375	20.71	236.871	341.73	41.86	143.048	39.6092			2-1	1.14375	5.4	61.7625	48.9357	20.7679
2-2	1.22375	20.71	253.439	407.88	30.29	123.547	51.2518			2-2	1.22375	5.4	66.0825	51.5152	22.044
2-3	1.2825	20.71	265.606	396.99	29.21	115.961	56.341			2-3	1.2825	5.4	69.255	38.8256	43.9382
2-4	1.35	20.71	279.585	378.42	29.24	110.65	60.4235			2-4	1.35	5.4	72.9	48.1729	33.9193
3-1	1.165	20.71	241.272	371.25	35.07	130.197	46.037			3-1	1.165	5.4	62.91	50.6014	19.5655
3-2	1.16875	20.71	242.048	361.74	35	126.609	47.6926			3-2	1.16875	5.4	63.1125	47.3518	24.9724
3-3	1.08875	20.71	225.48	335.37	38.97	130.694	42.0376			3-3	1.08875	5.4	58.7925	47.8238	18.6567
3-4	0.9775	20.71	202.44	285.09	29.49	84.073	58.4702			3-4	0.9775	5.4	52.785	39.3424	25.4667
4-1	1.18	20.71	244.378	404.22	33.52	135.495	44.5553			4-1	1.18	5.4	63.72	48.6277	23.6854
4-2	1.38875	20.71	287.61	413.16	35.18	145.35	49.4629			4-2	1.38875	5.4	74.9925	56.0658	25.2381
4-3	1.33375	20.71	276.22	399.84	32.52	130.028	52.9259			4-3	1.33375	5.4	72.0225	53.6985	25.442
4-4	1.235	20.71	255.769	267.63	31.29	83.7414	67.2589			4-4	1.235	5.4	66.69	34.899	47.6699
