# Supplementary material for: Effects of dietary fennel (Foeniculum vulgare Mill.) seed powder supplementation on growth performance, nutrient digestibility, small intestinal morphology, and carcass traits of broilers
Source: PeerJ. 2021 Jan 28;9:e10308. doi: 10.7717/peerj.10308 (PMC7847707; doi:10.7717/peerj.10308)
Supplement: Supplemental Information 2 [file peerj-09-10308-s002.xlsx]

## Sheet: body weight
	0 week(g)	1 weeks(g)	2 weeks(g)	3 weeks (g)	0-21d average daily gain(g)		4 weeks(g)	5 weeks(g)	6 weeks(g)	22-42d average daily gain(g)		0-42d average daily gain(g)
1-1	41.89	145.76	348.55	694.88	31.0948		1074.35	1374.34	2015.38	62.881		46.9879
1-2	44.13	151.32	412.09	713.65	31.8819		1047.72	1609.72	2084.45	65.2762		48.579
1-3	39.97	138.73	333.65	663.28	29.6814		1068.48	1636.98	2306.17	78.2329		53.9571
1-4	41.78	149.52	380.79	686.84	30.7171		1214.63	1754.57	2069.52	65.8419		48.2795
2-1	44.15	145.13	310.76	664.73	29.5514		1046.32	1429.34	1996.98	63.4405		46.496
2-2	45.02	153.05	378.65	681.41	30.3043		1177.38	1624.58	2023.45	63.9067		47.1055
2-3	40.24	149.22	388.54	696.53	31.2519		1079.45	1621.67	2327.12	77.6471		54.4495
2-4	39.44	153.21	360.82	707.34	31.8048		1054.37	1728.53	2124.46	67.4819		49.6433
3-1	39.97	150.65	362.73	683.94	30.6652		1044.58	1358.35	2067.4	65.879		48.2721
3-2	40.36	155.71	372.36	691.83	31.0224		1098.75	1542.62	1942.85	59.5724		45.2974
3-3	42.89	163.13	402.24	708.36	31.689		1084.36	1641.48	2004.57	61.7243		46.7067
3-4	44.47	157.591	381.36	743.64	33.2938		1141.28	1732.83	2308.95	74.5386		53.9162
4-1	39.28	146.94	325.56	658.51	29.4871		999.88	1367.39	1894.86	58.8738		44.1805
4-2	40.93	149.49	378.82	671.77	30.04		1077.84	1607.67	2025.53	64.4648		47.2524
4-3	42.59	151.26	412.12	705.55	31.5695		1094.71	1724.36	2390.38	80.23		55.8998
4-4	44.37	154.23	362.23	724.26	32.3757		1165.34	1594.35	2083.16	64.7095		48.5426

## Sheet: Feed intake
0-21d	daily feed intake （kg）	average daily feed intake (g)	0-21d average daily gain(g)	ratio of feed to gain		22-42d	daily feed intake （kg）	average daily feed intake (g)	22-42d average daily gain(g)	ratio of feed to gain		0-42d average daily feed intake (g)	0-42d average daily gain(g)	0-42d ratio of feed to gain
1-1	0.3425	48.9286	31.0948	1.57353		1-1	1.1875	169.643	62.881	2.69784		109.286	46.9879	2.32583
1-2	0.436	48.4444	31.8819	1.5195		1-2	1.1769	130.767	65.2762	2.00328		89.6056	48.579	1.84453
1-3	0.425	47.2222	29.6814	1.59097		1-3	1.2025	133.611	78.2329	1.70786		90.4167	53.9571	1.67571
1-4	0.4442	49.3556	30.7171	1.60678		1-4	1.29	143.333	65.8419	2.17693		96.3444	48.2795	1.99555
2-1	0.4015	44.6111	29.5514	1.50961		2-1	1.2417	137.967	63.4405	2.17474		91.2889	46.496	1.96337
2-2	0.4103	45.5889	30.3043	1.50437		2-2	1.2608	140.089	63.9067	2.19209		92.8389	47.1055	1.97087
2-3	0.3901	43.3444	31.2519	1.38694		2-3	1.2525	139.167	77.6471	1.7923		91.2556	54.4495	1.67597
2-4	0.4049	50.6125	31.8048	1.59135		2-4	1.2488	156.1	67.4819	2.31321		103.356	49.6433	2.08198
3-1	0.3905	48.8125	30.6652	1.59179		3-1	1.2485	156.062	65.879	2.36892		102.438	48.2721	2.12208
3-2	0.4321	48.0111	31.0224	1.54763		3-2	1.2676	140.844	59.5724	2.36426		94.4278	45.2974	2.08462
3-3	0.4304	47.8222	31.689	1.50911		3-3	1.28175	142.417	61.7243	2.3073		95.1194	46.7067	2.03653
3-4	0.4382	48.6889	33.2938	1.4624		3-4	1.2775	141.944	74.5386	1.90431		95.3167	53.9162	1.76787
4-1	0.3913	48.9125	29.4871	1.65877		4-1	1.2409	155.112	58.8738	2.63466		102.012	44.1805	2.309
4-2	0.4102	45.5778	30.04	1.51724		4-2	1.25475	139.417	64.4648	2.16268		92.4972	47.2524	1.95751
4-3	0.3855	48.1875	31.5695	1.52639		4-3	1.25375	156.719	80.23	1.95337		102.453	55.8998	1.8328
4-4	0.4132	45.9111	32.3757	1.41807		4-4	1.255	139.444	64.7095	2.15493		92.6778	48.5426	1.9092
