# Supplementary material for: Effects of dietary fennel (Foeniculum vulgare Mill.) seed powder supplementation on growth performance, nutrient digestibility, small intestinal morphology, and carcass traits of broilers
Source: PeerJ. 2021 Jan 28;9:e10308. doi: 10.7717/peerj.10308 (PMC7847707; doi:10.7717/peerj.10308)
Supplement: Supplemental Information 3 [file peerj-09-10308-s003.xlsx]

## Sheet: carcass traits
	live weight (kg)	carcass weight (kg)	half-eviscerated weigh (kg)	eviscerated weight (kg)	abdominal fat weight (g)	breast muscle weight (kg)	leg muscle weight (kg)	Fat width (mm)	breast muscle area (cm2)			carcass percentage	half-eviscerated percentage	eviscerated percentage	breast muscle percentage	leg muscle percentage	abdominal fat percentage	fat width index	breast muscle area index
1-1	2.09	1.84	1.72	1.48	14.05	0.50085	0.26034	0.695	63.13			88.0383	82.2967	70.8134	33.8412	17.5905	0.949324	0.332536	30.2057
1-2	2.24	2.14	1.95	1.68	27.55	0.566	0.21574	0.717	65.45			95.5357	87.0536	75	33.6905	12.8417	1.63988	0.320089	29.2188
1-3	2.01	1.83	1.69	1.47	34.75	0.58198	0.28253	0.738	66.26			91.0448	84.0796	73.1343	39.5905	19.2197	2.36395	0.367164	32.9652
1-4	1.98	1.95	1.84	1.62	15.85	0.526	0.24848	0.731	65.69			98.4848	92.9293	81.8182	32.4691	15.3383	0.978395	0.369192	33.1768
2-1	1.97	1.86	1.894	1.57	18.33	0.69083	0.26048	0.881	61.52			94.4162	96.1421	79.6954	44.0019	16.5911	1.16752	0.447208	31.2284
2-2	2.32	2.14	1.88	1.69	26.94	0.66691	0.23553	0.918	67.64			92.2414	81.0345	72.8448	39.4621	13.9367	1.59408	0.39569	29.1552
2-3	2.15	1.936	1.84	1.61	12.86	0.59236	0.27613	0.967	69.16			90.0465	85.5814	74.8837	36.7925	17.1509	0.798758	0.449767	32.1674
2-4	2.23	2.21	1.962	1.74	13.79	0.537	0.272	0.954	64.67			99.1031	87.9821	78.0269	30.8621	15.6322	0.792529	0.427803	29
3-1	1.96	1.89	1.78	1.702	22.93	0.595	0.19	0.701	54.36			96.4286	90.8163	86.8367	34.9589	11.1633	1.34724	0.357653	27.7347
3-2	2.27	2.223	1.94	1.58	16.61	0.50034	0.22093	0.712	58.33			97.9295	85.4626	69.6035	31.6671	13.9829	1.05127	0.313656	25.696
3-3	2.16	1.913	1.825	1.61	30.46	0.45126	0.2697	0.732	64.62			88.5648	84.4907	74.537	28.0286	16.7516	1.89193	0.338889	29.9167
3-4	2.335	2.101	1.982	1.67	14.533	0.622	0.20772	0.704	62.21			89.9786	84.8822	71.5203	37.2455	12.4383	0.87024	0.301499	26.6424
4-1	1.96	1.83	1.74	1.55	26.45	0.5333	0.3053	0.723	50.95			93.3673	88.7755	79.0816	34.4065	19.6968	1.70645	0.368878	25.9949
4-2	2.24	2.11	2.015	1.64	29.06	0.56451	0.20374	0.736	57.87			94.1964	89.9554	73.2143	34.4213	12.4232	1.77195	0.328571	25.8348
4-3	2.07	1.97	1.802	1.52	19.22	0.51593	0.28332	0.748	54.16			95.1691	87.0531	73.43	33.9428	18.6395	1.26447	0.361353	26.1643
4-4	2.28	2.14	1.86	1.702	24.315	0.47373	0.25758	0.755	62.54			93.8596	81.5789	74.6491	27.8337	15.134	1.42861	0.33114	27.4298
