# Supplementary material for: Effects of dietary fennel (Foeniculum vulgare Mill.) seed powder supplementation on growth performance, nutrient digestibility, small intestinal morphology, and carcass traits of broilers
Source: PeerJ. 2021 Jan 28;9:e10308. doi: 10.7717/peerj.10308 (PMC7847707; doi:10.7717/peerj.10308)
Supplement: Supplemental Information 4 [file peerj-09-10308-s004.xlsx]

## Sheet: intestinal morphological index
	Intestinal wall thickness (µm)				Crypt depth (µm)				Villus height (µm)
	Duodenum	Jejunum	Ileum		Duodenum	Jejunum	Ileum		Duodenum	Jejunum	Ileum
1-1	241.54	200.56	290.51		190.46	183.27	218.52		967.82	1089.65	999.36
1-2	239.62	244.73	340.62		201.01	200.45	340.46		1319.66	1387.93	1346.59
1-3	199.42	328.11	399.54		270.32	168.38	276.51		1356.45	1534.72	1021.43
1-4	272.31	236.84	310.34		177.54	257.31	290.59		1615.79	1452.54	1147.64
2-1	211.84	218.68	300.59		190.39	194.32	213.67		988.34	1259.34	949.94
2-2	284.43	271.36	429.17		258.47	264.09	379.56		1692.09	1358.54	1224.35
2-3	276.63	300.61	474.52		216.76	219.34	306.63		1464.69	1592.97	1207.62
2-4	269.19	260.28	437.36		241.87	224.26	284.46		1367.25	1356.42	1465.57
3-1	220.64	239.34	398.58		208.46	219.63	302.65		1023.45	1217.83	1192.58
3-2	323.62	347.46	451.75		280.64	250.68	390.15		1495.66	1516.64	1515.92
3-3	275.45	331.34	434.51		302.96	283.51	286.38		1686.12	1784.78	1724.97
3-4	300.54	319.27	530.12		262.83	206.78	302.26		1824.54	1604.11	1535.85
4-1	278.94	228.86	373.54		197.58	196.23	236.33		1513.52	1276.69	1353.86
4-2	326.74	333.67	410.65		259.62	230.06	314.16		963.74	1523.46	1258.76
4-3	239.64	283.36	391.47		243.95	256.14	309.31		1809.15	1465.88	1499.07
4-4	268.89	291.15	505.22		280.93	222.05	364.24		1624.24	1488.49	1367.83
