# Supplementary material for: Effects of dietary fennel (Foeniculum vulgare Mill.) seed powder supplementation on growth performance, nutrient digestibility, small intestinal morphology, and carcass traits of broilers
Source: PeerJ. 2021 Jan 28;9:e10308. doi: 10.7717/peerj.10308 (PMC7847707; doi:10.7717/peerj.10308)
Supplement: Supplemental Information 5 [file peerj-09-10308-s005.xlsx]

## Sheet: Intestinal weight and length
													Intestinal weight index				Intestinal length index
	live weight (kg)	Muscular stomach (g)	Glandular stomach (g)	Duodenum weight (g)	Duodenum length (cm2)	Jejunum weight (g)	Jejunum length (cm2)	Ileum weight (g)	Ileum length (cm2)	Cecum weight (g)	Cecum length (cm2)		Duodenum	Jejunum	Ileum	Cecum	Duodenum	Jejunum	Ileum	Cecum
1-1	2.09	14.93	4.79	8.32	13.45	20.26	55.16	13.31	46.81	13.78	14.36		3.98086	9.69378	6.36842	6.5933	6.43541	26.3923	22.3971	6.87081
1-2	2.24	15.16	5.93	13.25	12.22	17.75	49.28	15.42	53.43	15.92	14.88		5.91518	7.92411	6.88393	7.10714	5.45536	22	23.8527	6.64286
1-3	2.01	15.435	5.61	10.59	11.25	17.32	51.19	14.93	53.44	16.43	15.31		5.26866	8.61692	7.42786	8.17413	5.59701	25.4677	26.5871	7.61692
1-4	1.98	17.45	5.52	11.36	12.09	18.84	47.38	16.02	56.32	14.87	16.45		5.73737	9.51515	8.09091	7.5101	6.10606	23.9293	28.4444	8.30808
2-1	1.97	14.65	4.63	8.87	10.34	22.42	50.83	15.4	49.53	13.18	13.21		4.50254	11.3807	7.81726	6.69036	5.24873	25.802	25.1421	6.70558
2-2	2.32	17.53	6.87	12.24	10.95	21.13	57.31	16.54	49.32	13.71	14.21		5.27586	9.10776	7.12931	5.90948	4.71983	24.7026	21.2586	6.125
2-3	2.15	14.88	6.32	10.17	12.53	18.51	55.42	15.13	46.11	16.87	16.34		4.73023	8.6093	7.03721	7.84651	5.82791	25.7767	21.4465	7.6
2-4	2.23	19.63	6.11	9.56	11.18	19.94	46.44	15.62	55.04	14.24	14.24		4.287	8.9417	7.00448	6.38565	5.01345	20.8251	24.6816	6.38565
3-1	1.96	16.89	5.94	12.44	12.95	20.44	66.43	14.07	50.66	13.47	13.43		6.34694	10.4286	7.17857	6.87245	6.60714	33.8929	25.8469	6.85204
3-2	2.27	16.667	5.22	12.55	14.66	23.89	63.41	18.62	58.56	15.789	16.39		5.52863	10.5242	8.20264	6.95551	6.45815	27.9339	25.7974	7.22026
3-3	2.16	18.354	6.88	13.07	13.78	24.74	62.53	20.35	55.35	15.98	15.56		6.05093	11.4537	9.4213	7.39815	6.37963	28.9491	25.625	7.2037
3-4	2.335	21.126	6.08	11.38	10.64	25.61	56.64	19.17	54.43	16.77	16.62		4.87366	10.9679	8.20985	7.18201	4.55675	24.257	23.3105	7.11777
4-1	1.96	16.85	5.67	9.44	10.35	16.52	55.18	14.33	52.31	14.32	13.39		4.81633	8.42857	7.31122	7.30612	5.28061	28.1531	26.6888	6.83163
4-2	2.24	14.97	4.31	8.99	10.56	18.55	56.45	15.05	58.39	14.53	14.65		4.01339	8.28125	6.71875	6.48661	4.71429	25.2009	26.067	6.54018
4-3	2.07	22.13	6.26	12.37	10.95	17.81	53.07	18.09	54.09	16.14	15.94		5.97585	8.60386	8.73913	7.7971	5.28986	25.6377	26.1304	7.70048
4-4	2.28	20.34	5.56	9.21	11.14	20.21	63.37	15.34	53.21	15.01	16.02		4.03947	8.86404	6.72807	6.58333	4.88596	27.7939	23.3377	7.02632
