# Supplementary material for: Effects of dietary fennel (Foeniculum vulgare Mill.) seed powder supplementation on growth performance, nutrient digestibility, small intestinal morphology, and carcass traits of broilers
Source: PeerJ. 2021 Jan 28;9:e10308. doi: 10.7717/peerj.10308 (PMC7847707; doi:10.7717/peerj.10308)
Supplement: Supplemental Information 6 [file peerj-09-10308-s006.xlsx]

## Sheet: meat quality
	Water loss rate (%)							pH45min
	breast muscle	leg muscle		Breast muscle drip loss (%)	Breast muscle tenderness (kg·f)	Cooked meat rate (%)		breast muscle	leg muscle		Abdominal fat percentage (%)
1-1	14.29	20.46		11.97	2.89	67.93		5.23	5.38		1.23
1-2	19.38	26.54		12.75	3.84	68.88		5.65	5.31		1.74
1-3	20.17	29.24		12.92	4.96	69.77		5.97	6.25		0.99
1-4	24.64	24.25		12.81	3.44	71.42		6.51	5.62		1.93
2-1	18.88	19.61		13.03	1.94	66.42		6.02	6.29		0.99
2-2	16.89	20.96		12.97	4.05	68.44		6.43	5.6		1.06
2-3	26.84	25.83		12.62	3.09	68.13		6.88	6.48		1.76
2-4	28.87	26.52		11.91	3.29	70.46		6.12	6.27		1.11
3-1	14.64	17.89		12.83	2.68	66.94		5.68	5.67		1.03
3-2	28.88	19.69		12.66	3.52	68.42		5.83	5.94		1.54
3-3	28.74	22.41		13.19	3.37	68.05		6.41	5.63		1.26
3-4	22.63	23.96		11.92	3.79	69.32		6.09	6.05		1.29
4-1	14.98	19.95		12.65	1.81	68.02		5.98	5.97		1.14
4-2	20.36	27.73		11.81	2.53	69.25		5.78	6.08		1.63
4-3	18.55	21.62		13.02	2.42	68.78		6.33	6.1		1.53
4-4	24.35	27.39		12.8	3.21	70.63		6.05	6.03		1.87
